# Supplementary material for: A polymeric dual-channel amperometric biosensor chip capable of symmetrically splitting sample bands for parallel micro flow injection determination of glucose and lactate
Source: Royal Society of Chemistry journal article supplement (doi:10.1039/c2ay25311a), 2012-01-01
Supplement: c2ay25311a.pdf [file c2ay25311a.pdf]

## Electronic Supplementary Material

A Polymeric Dual-Channel Biosensor Chip Capable of Symmetrically  
Splitting Sample Bands for Parallel Micro Flow Injection Determination  
of Glucose and Lactate

Yi Wang, Qiaohong He\*, Xianqiao Hu, Yiwen Zhang, Hengwu Chen

Institute of Micro-analytical Systems, Department of Chemistry, Zhejiang University,  
Zijin'gang Campus, Hangzhou 310058, China

\*Author to whom correspondence should be addresses; E-mail: heqh@zju.edu.cn;

Tel.: +86-571-88206773; Fax: +86-571-88273572

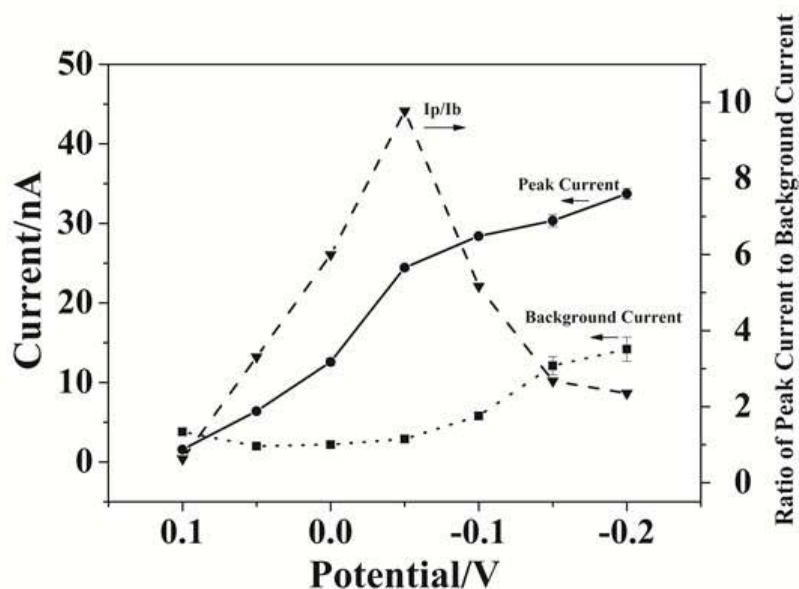

(a)

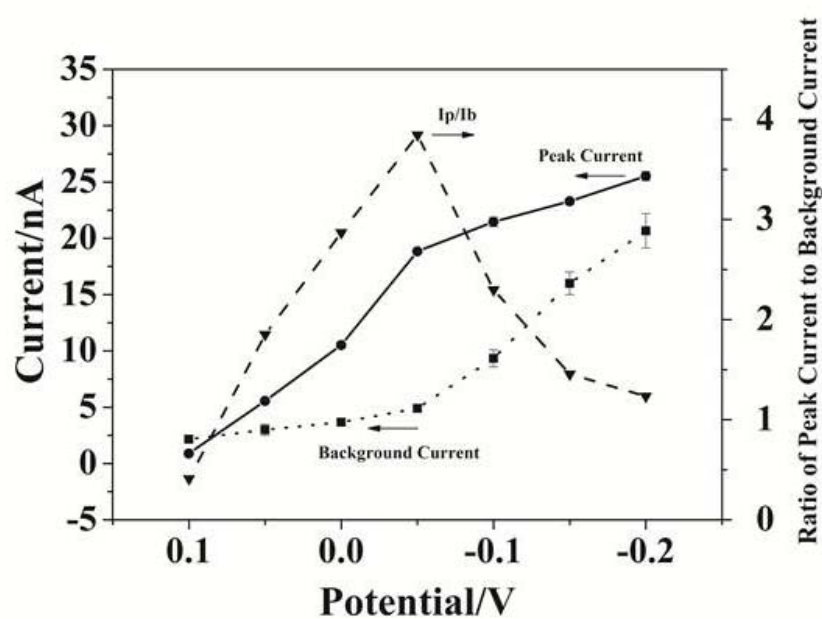

(b)

**Fig. S1** Hydrodynamic voltammograms of glucose (a) and lactate (b) obtained with the developed  $\mu$ -FI-AB chip. Peak current ( $I_p$ ) (solid line), background current ( $I_b$ ) (dot line) and ratio of  $I_p$ -to- $I_b$  (dash line). Experimental conditions: carrier solution, 30 mmol L<sup>-1</sup> phosphate buffer (pH 7.4); carrier flow rate, 6  $\mu$ L min<sup>-1</sup>; sample volume, 20 nL

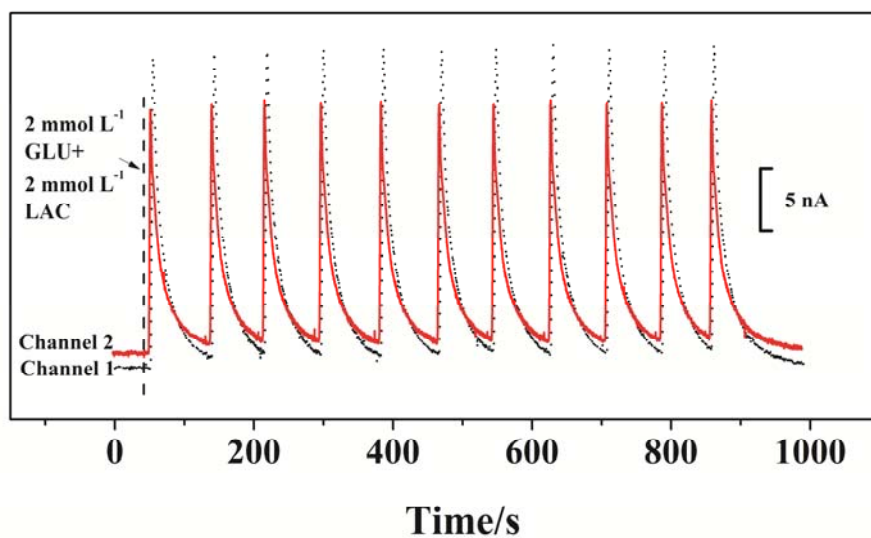

**Fig. S2** Typical recording traces of 11 consecutive runs with a glucose (black) or a lactate (red) standard solution. Experimental conditions: carrier solution, 30 mmol L<sup>-1</sup> phosphate buffer (pH 7.4); detection potential, -0.05 V; carrier flow rate, 6 μL min<sup>-1</sup>; sample volume, 20 nL
